# Supplementary material
Source: publisher figshare collection journal article supplement (https://frontiersin.figshare.com/ndownloader/files/31321138)
Supplement: Supplementary file 1 [file 31321138]

**Table S1.** Parameters of the calculated boundary-line analysis for stomatal conductance vs. air temperature (r2 is the coefficient of determination) for 15 tree species from Mexico City’s urban forest

| **Species** | **A (mmol m-2 s-1)** | **B (mmol m-2 s-1)** | **C (mmol m-2 s-1)** | **r2** |
| --- | --- | --- | --- | --- |
| *Acacia longifolia* | -986.01 | 177.19 | -4.51 | 0.96 |
| *Acer negundo* | -1116.77 | 198.03 | -5.04 | 0.97 |
| *Alnus acuminata* | -2250.65 | 365.49 | -9.05 | 0.98 |
| *Buddleja cordata* | -135.15 | 35.13 | -0.80 | 0.97 |
| *Celtis occidentalis* | -5156.70 | 497.48 | -10.22 | 0.96 |
| *Dodonaea viscosa* | -89.05 | 27.73 | -0.64 | 0.96 |
| *Eucaliptus camaldulensis* | -3996.25 | 385.94 | -6.74 | 0.93 |
| *Erythrinia americana* | -1838.84 | 266.17 | -6.35 | 0.91 |
| *Fraxinus uhdei* | -2162.13 | 231.61 | -4.17 | 0.97 |
| *Ligustrum lucidum* | -4067.23 | 406.33 | -7.30 | 0.96 |
| *Liquidambar styraciflua* | -3076.70 | 297.70 | -5.40 | 0.95 |
| *Populus alba* | -1291.10 | 226.94 | -5.68 | 0.84 |
| *Populus deltoides* | -1523.60 | 279.26 | -7.77 | 0.85 |
| *Quercus rugosa* | -1310.25 | 281.52 | -7.25 | 0.87 |
| *Ulmus parvifolia* | -1853.38 | 197.73 | -3.92 | 0.92 |
